# Supplementary material
Source: publisher site journal article supplement (https://www.dovepress.com/article/264148)
Supplement: Supplementary file 1 [file get_supplementary_file.php]

**Appendix 1: A learning theory of attachment**

According to this Learning Theory of Attachment (LTA), children’s view of primary caregivers seems to shift as the result of safety conditioning. Safety conditioning occurs over single learning events - events during which distress is followed by caregivers’ comfort. Comfort positively affects children’s endocrinological systems. For example, cortisol levels decrease resulting in a sense of relief, oxytocin levels increase resulting a sense of safety and care, and dopamine levels increase which has a reinforcing effect. Such learning trials result in secure state attachment: children feel, in the moment, that they can trust in their caregivers’ support. In conditioning research, it has been demonstrated that contingency determines whether or not conditioning occurs. Contingency is the probability that the Conditional Stimulus (CS) is followed by the Uncondtional Stimulus (UCS). This is respectively parent and comfort in the LTA (see Figure 3). If attachment-related CS-UCS contingency is high enough, the caregiver gets increasingly perceived by the child in a more positive way. These children develop the appraisal that they can trust in the caregiver’s support, and they develop a cognitive script about how care during distress will unfold during interactions with the caregiver (called a secure base script; Waters & Waters, 2006). This way, secure attachment becomes a relation-specific trait-like feature (see Figure 1). To develop trait-like secure attachment, CS-UCS contingency does not need to be 100%. Instead, there are good reasons why children every now and then experience that parents are unavailable. For example, parents can be consumed by their own stressors, tired, distracted, or for other reasons respond in ways that children experience as unsupportive. Although such interactions activate a decrease in state trust and secure state attachment, children continue to develop trait-like secure attachment if on average the number of learning trials where the CS is followed by the UCS is high enough (Bosmans et al., 2019).

Appendix Figure: Classical conditioning components of the Learning Theory of Attachment


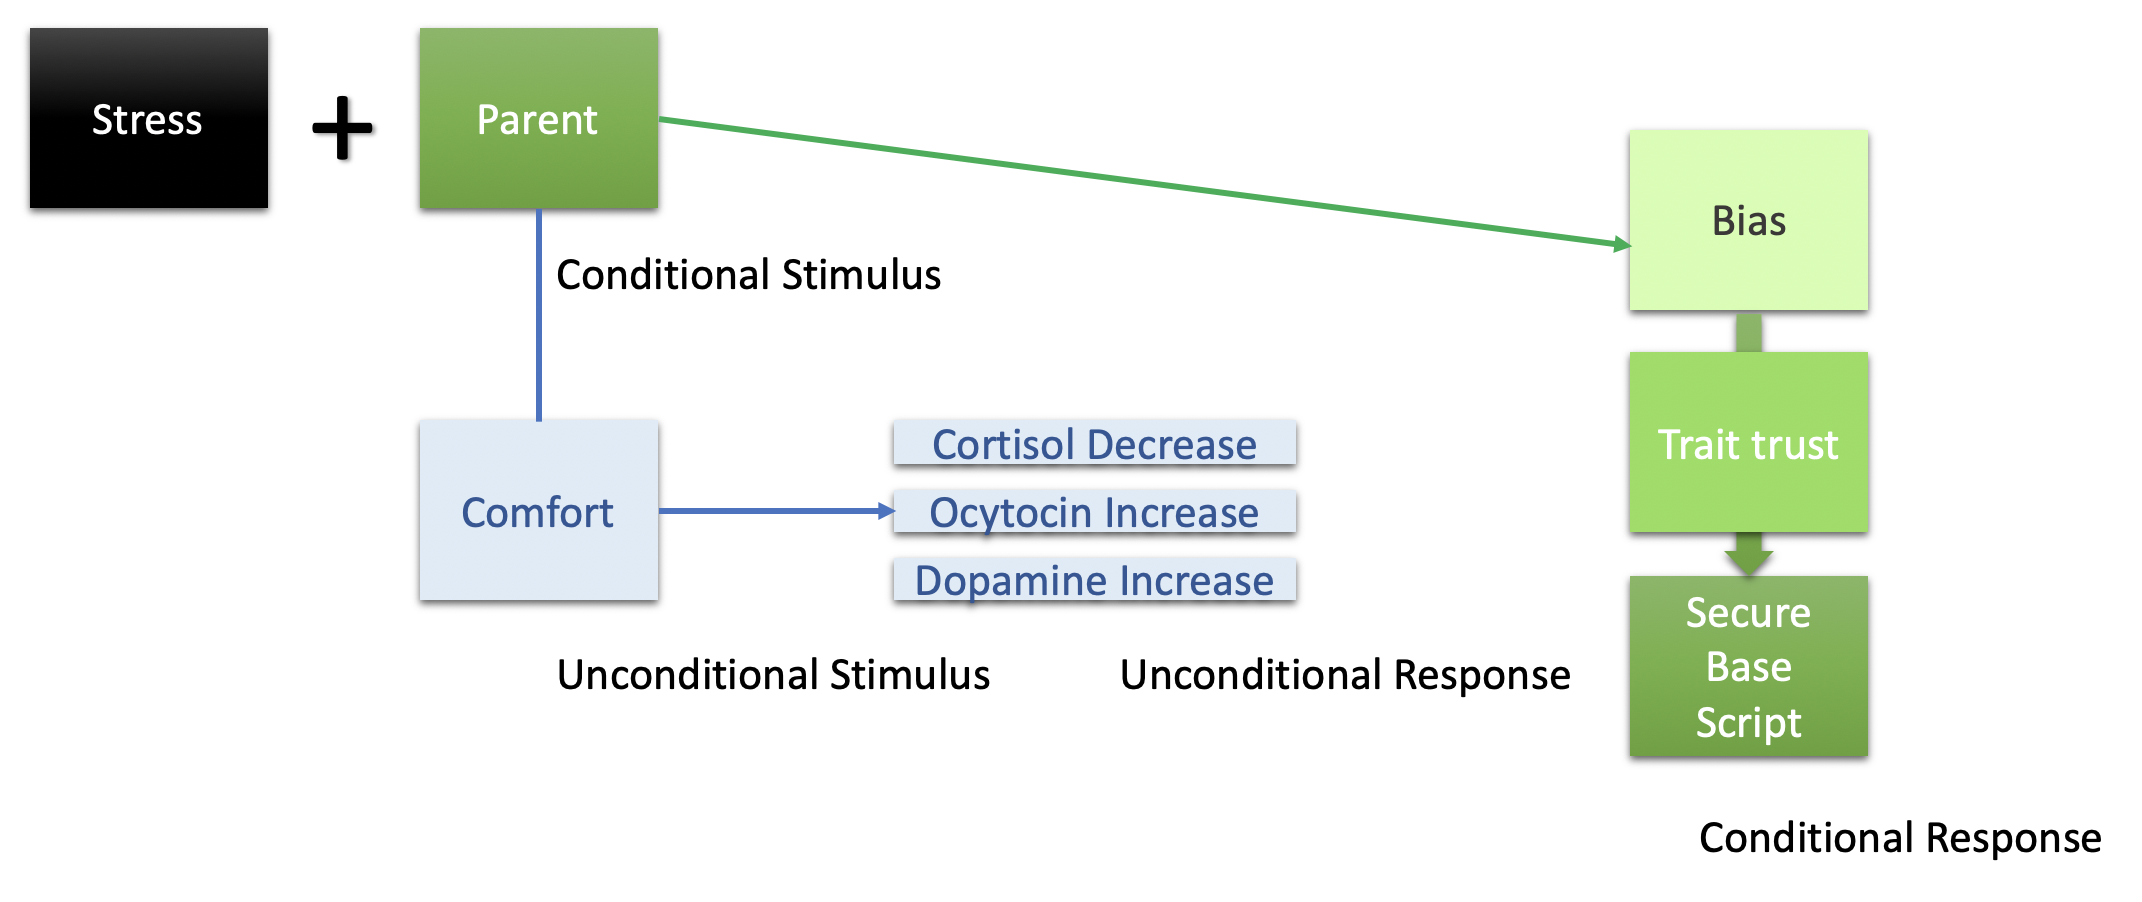


Note: This figure depicts how the parent can become a safety signal that predicts coping with

stress. If children are distressed and a parent (Conditional Stimulus; CS) provides comfort

(Unconditional Stimulus; UCS), this has immediate endocrinological effects (Unconditional

Response; UCR). If the CS and UCS get paired, the parent will start eliciting a Conditional

Response (CR), starting with shifts in the processing of attachment-related information (Bias),

resulting in increased trust at the trait level (Trait trust), and finally resulting in increasing

knowledge about the Secure Base Script (Figure taken from Bosmans et al., 2020). In a similar vein, children’s attachment behavior was argued to develop through operant conditioning and the same reinforcing stimuli (Bosmans et al., 2020). Reprinted with permission from Bosmans, G., Bakermans-Kranenburg, M., Vervliet, B., Verhees, M., & van IJzendoorn, M. (2020). A learning theory of attachment: Unraveling the black box of attachment development. Neuroscience And Biobehavioral Reviews, 113, 287-298.1

However, when learning trials are overwhelmingly successful, children will become more insecurely attached at trait-like level. Instead of a secure base script, children will develop so-called early maladaptive schemas that organize their proximity- and support-seeking behavior in congruence with their expectation that care-related interactions will feel rejecting and painful. However, also children that develop trait-like insecure attachment, will have memories of more succesful care-related interactions with their attachment figures. This implies that, independent of their attachment (in)security at trait level, all children have a relational learning history that entails both positive and negative learning experiences.

References

1 Bosmans, G., Bakermans-Kranenburg, M., Vervliet, B., Verhees, M., & van IJzendoorn, M. (2020). A learning theory of attachment: Unraveling the black box of attachment development. Neuroscience And Biobehavioral Reviews, 113, 287-298. doi: 10.1016/j.neubiorev.2020.03.014
